# Supplementary material for: Understanding the loss mechanisms in high-performance solution-processed small molecule bulk heterojunction solar cells doped with a PFN impurity
Source: Royal Society of Chemistry journal article supplement (doi:10.1039/c9cp01732a), 2019-01-01
Supplement: c9cp01732a1.pdf [file c9cp01732a1.pdf]

**Understanding the loss  
mechanisms in high-performance  
solution-processed small molecule  
bulk heterojunction solar cells  
doped with PFN impurity**

**Ali Aghassi\*, Cormac D. Fay**

Intelligent Polymer Research Institute, AIIM Faculty, University of Wollongong, Innovation  
Campus, Squires Way, Wollongong, 2500, Australia

**Corresponding Author**

**Email:** ([aa009@uowmail.edu.au](mailto:aa009@uowmail.edu.au)) (Ali Aghassi, Ph.D.)

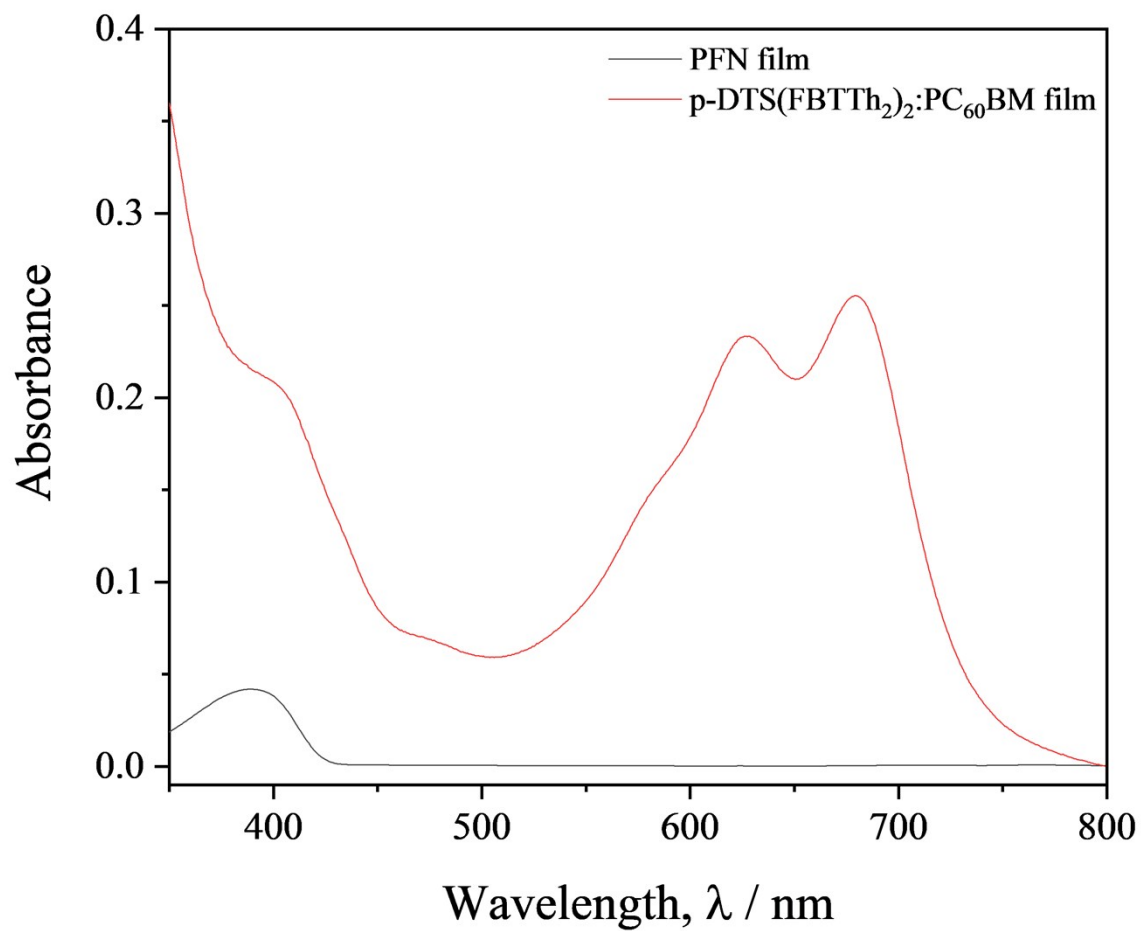

Figure S1. UV-Vis absorption characteristics of PFN film and p-DTS(FBTTh<sub>2</sub>)<sub>2</sub>:PC<sub>60</sub>BM BHI film.

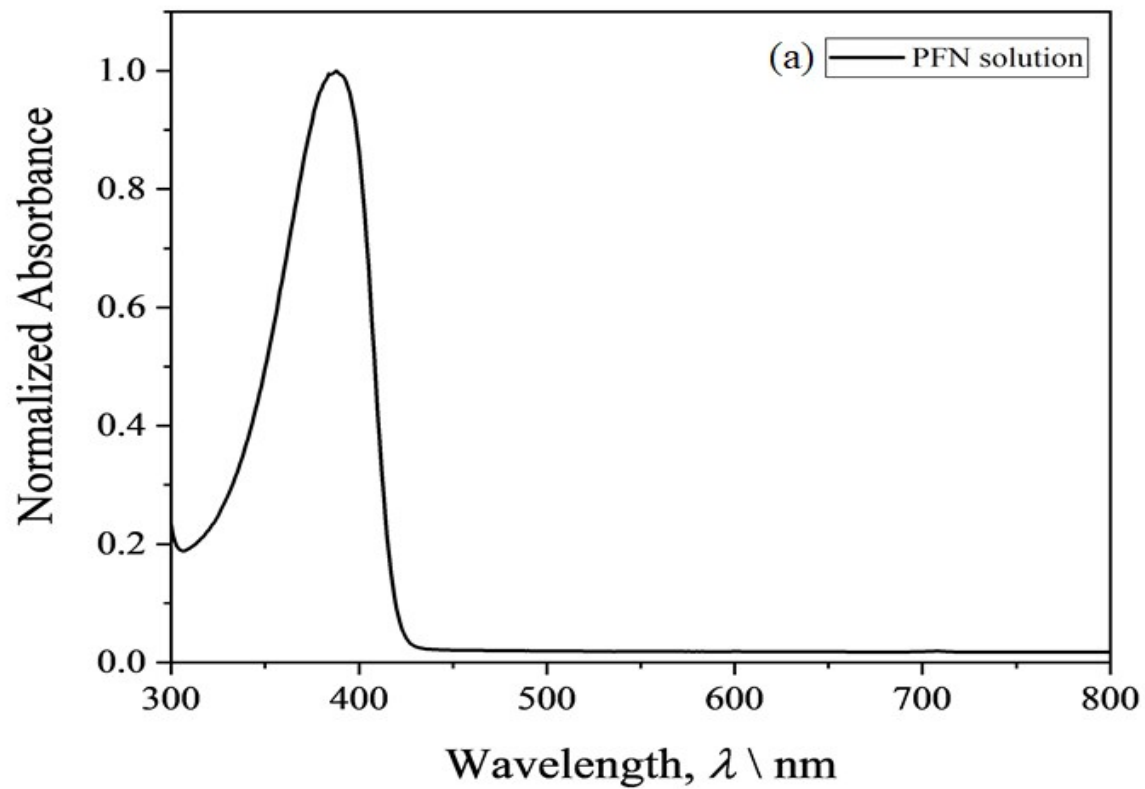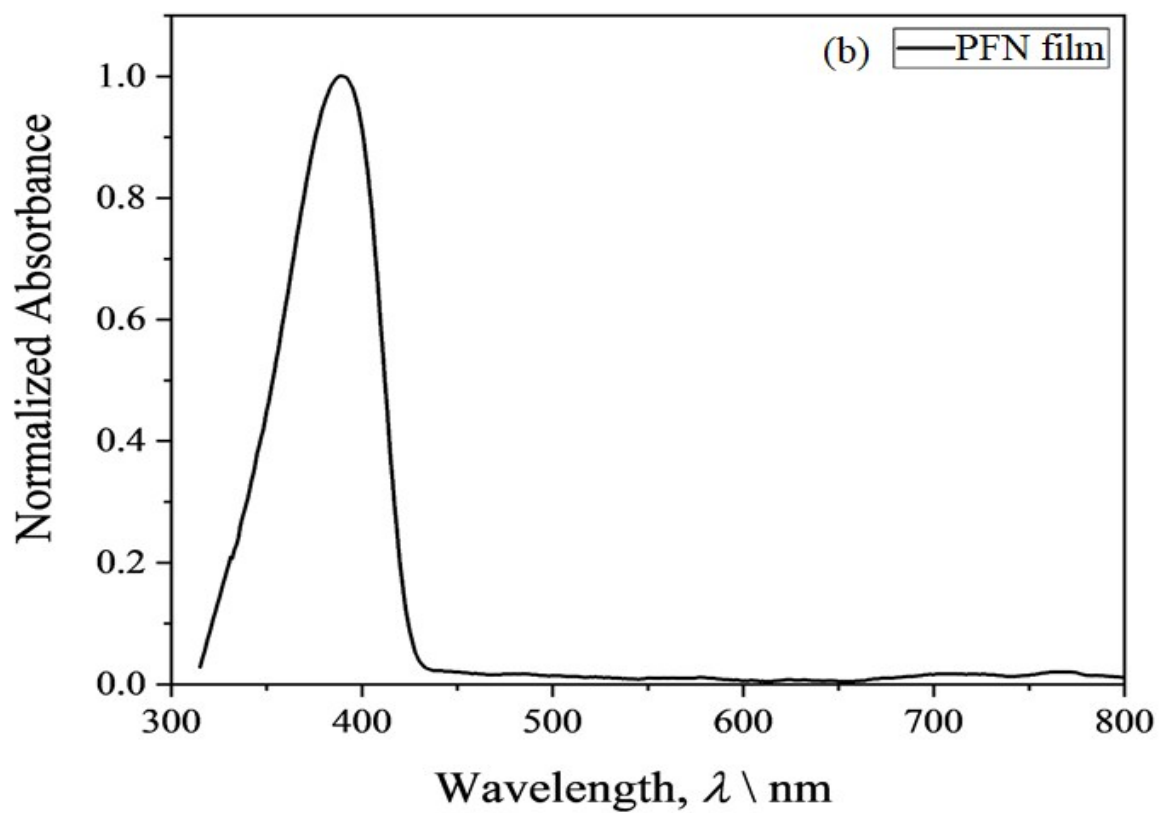

**Figure S2.** Normalized absorption characteristics of (a) PFN dissolved in 1,2-dichlorobenzene(o-DCB) and (b) PFN film cast from the o-DCB solution.

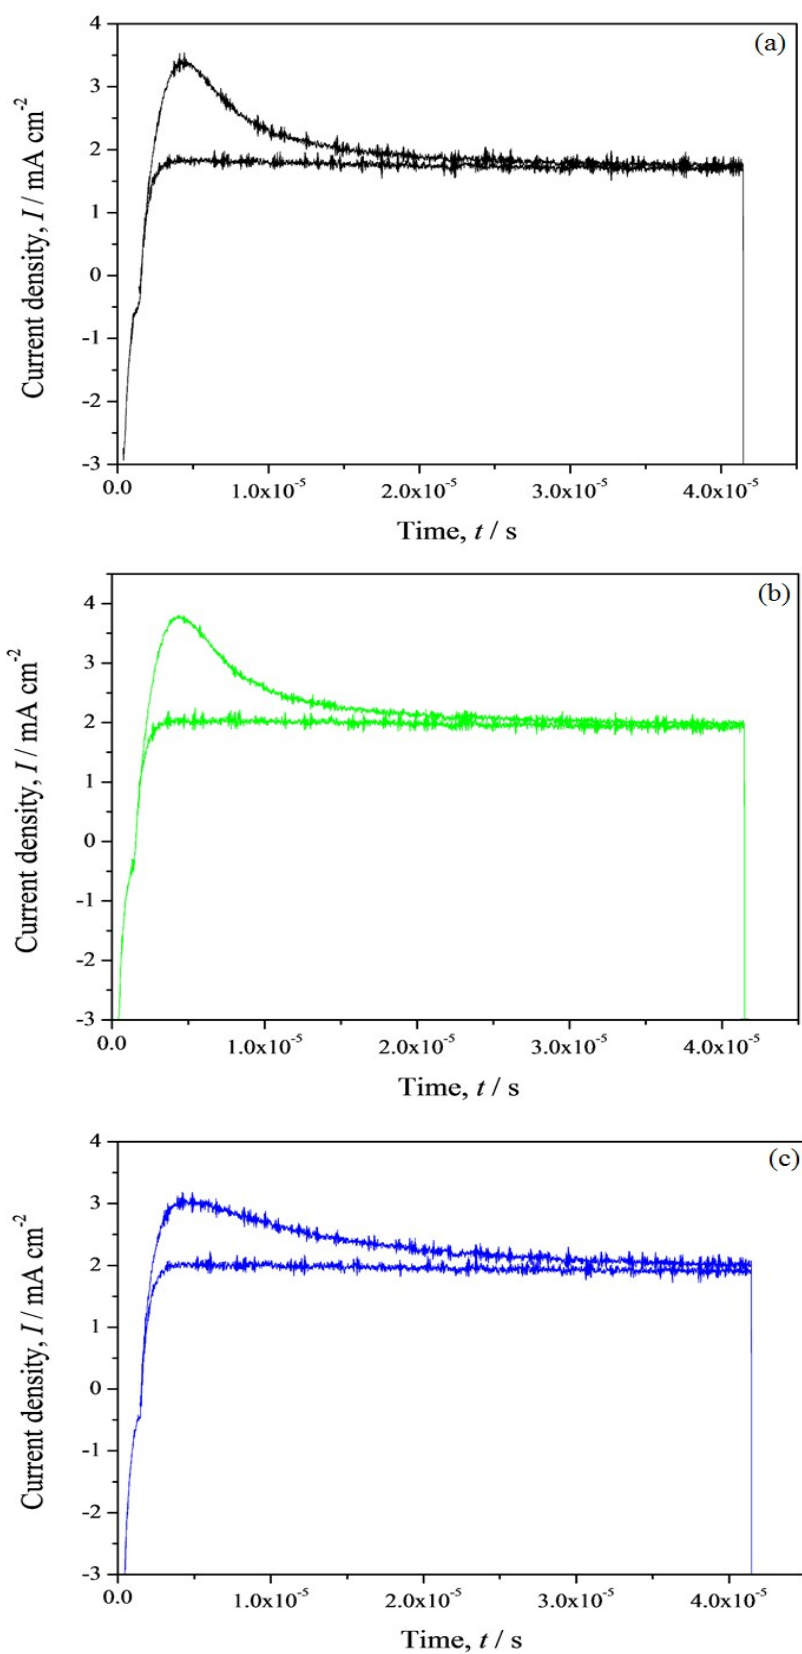

**Figure S3.** Photo-CELIV curves of the p-DTS(FBTh<sub>2</sub>)<sub>2</sub>:PC<sub>60</sub>BM BHJ solar cell devices (a) without, and with the incorporation of (b) 0.014% wt and (c) 0.029% wt PFN in the bulk heterojunction. The laser energy was 10  $\mu\text{J}$ . The applied voltage was 2 V with speed rise of 25000 Hz. The delay between photogeneration and charge extraction was 2  $\mu\text{s}$ .
